# Supplementary material for: Desmin interacts with STIM1 and coordinates Ca2+ signaling in skeletal muscle
Source: JCI journal article supplement (doi:10.1172/jci.insight.143472), 2021-09-07
Supplement: sd1 [file 1]

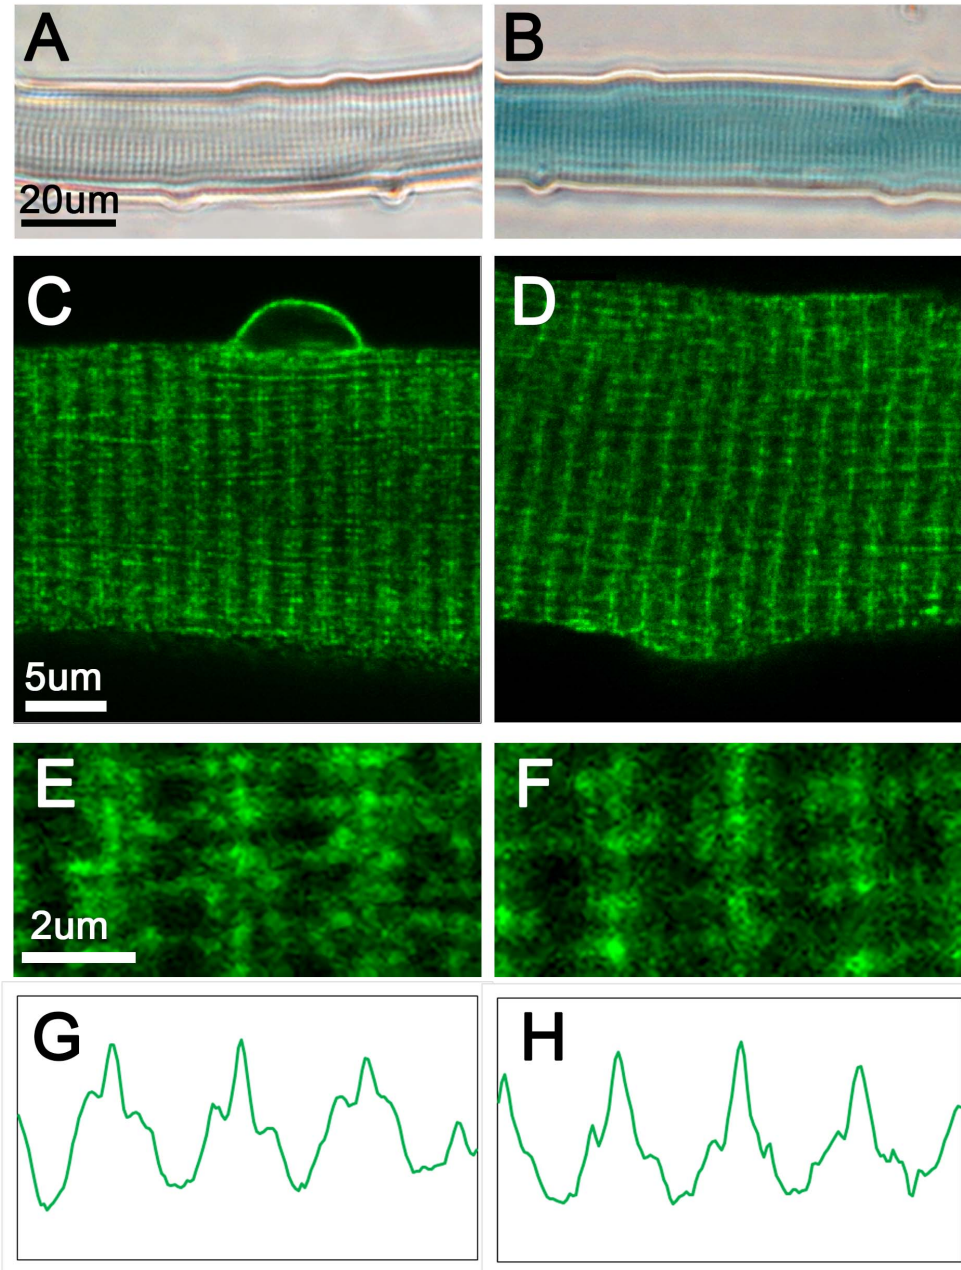

**Supplemental Figure 1:** Stim1 and STIM1-LacZ localization in WT and STIM1<sup>+gt</sup> FDB fibers. **A)** FDB fibers after x-gal staining reveals Stim1-LacZ localization (left, blue precipitate) as demonstrated by x-gal staining of STIM1<sup>+gt</sup> fibers. **B)** No staining is detected in the WT fibers

(right) **C-F**) Antibody staining of Stim1 (green) in WT (C and E) and STIM1<sup>+/*gt*</sup> mice (D and F). **G-H**) Profiles of expression data shown in images E) WT and F) STIM1<sup>+/*gt*</sup> respectively.

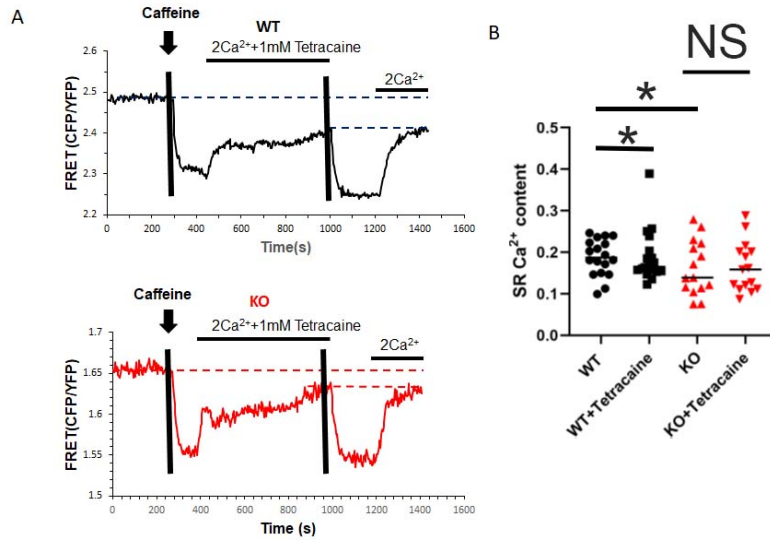

**Supplemental Figure 2. The effect of tetracaine on SR Ca<sup>2+</sup> content and uptake in WT and Des KO mouse FDB fibers.** A, representative traces of SR Ca<sup>2+</sup> release from WT and Des KO FDB fibers in the presence of 1 mM tetracaine and in the absence of tetracaine. Ca<sup>2+</sup> from SR was released by 30mM caffeine as indicated by a vertical black bar and arrow. B: summarized data of SR Ca<sup>2+</sup> release by caffeine in the presence and absence of 1mM tetracaine from WT (n=18) and Des KO (n=15) FDB fibers.

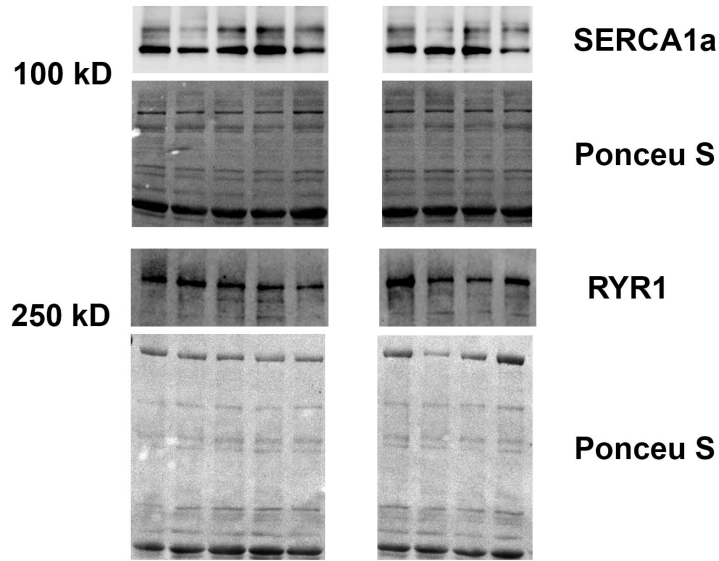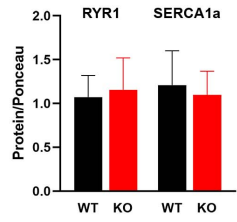

**Supplementary Figure 3: Ca<sup>2+</sup> handling proteins in the WT and DES KO muscle.** A) Confocal micrographs of double immunolabeling for STIM1 (green, left) and SERCA1 (red, middle) was performed in WT (top panel) and DES KO fibers (bottom panel). Overlap of STIM1 (r=0.225) and SERCA (r=0.226) (p=0.99) were quantified and compared based on the Pearson's coefficient for WT (n=3 mice, 14 fibers) and DES KO fibers (n=3 mice, 16 fibers). B) Western blot of RYR1 and SERCA in 5 preparations from WT and DES KO muscle. GAPDH was blotted from the same membrane for a loading control. C) Quantification of normalized protein level of SERCA1 in WT (n=5) and DES KO (n=5) muscle fibers, no significant difference between two groups was found. D) Quantitative of RT-PCR with primers specific for sarcolipin (SLN) in the WT (n=5) and DES KO (n=5) muscle fibers.

Supplementary Table: Antibodies used for studies in manuscript.

| Antigen                  | Host        | Dilution | Manufacturer     | Cat #          | Use       |
|--------------------------|-------------|----------|------------------|----------------|-----------|
| Stim1 C terminus         | Mouse mono  | 1:2000   | Affinity Bio     | MA1--19451     | WB, IP    |
| Stim1 N terminus         | Mouse mono  | 1:200    | BD Bioscience    | 610954         | IF        |
| Stim1 N terminus         | Rabbit poly | 1:2000   | Protein Tec      | 11565-1-AP     | WB, ELISA |
| Orai1                    | Rabbit poly | 1:100    | Affinity Bio     | Specially made | IF        |
| Orai1                    | Rabbit poly | 1:2000   | Alamone          | ACC-062        | WB        |
| Desmin                   | Rabbit poly | 1:50     | Abcam            | Ab15200        | IF        |
| Desmin                   | Rabbit poly | 1:2000   | Abcam            | Ab8592         | WB, IP    |
| Poly histidine           | Mouse mono  | 1:3000   | Sigma            | A1029          | IF, ELISA |
| Serca1                   | Mouse mono  | 1:1000   | Thermo Fisher    | VE121G9        | Wb, IP    |
| TRPC1                    | Rabbit poly | 1:1000   | Affinity Bio     | Specially made | ELISA     |
| SC71 - Myosin 2a         | Mouse       | 1/100    | Hybridoma        | SC71c          | IF        |
| BF-F3 – Myosin 2b        | Mouse       | 1/100    | Hybridoma        | BF-F3c         | IF        |
| Mouse IgM 488            | Goat poly   | 1/500    | Molecular probes |                | IF        |
| Mouse IgG $\gamma$ 1 555 | Goat poly   | 1/500    | Molecular probes | A21127         | IF        |
| Mouse IgG 488            | Goat poly   | 1/500    | Molecular probes | A11029         | IF        |
| Rabbit 488               | Goat poly   | 1/500    | Molecular probes |                | IF        |
| Rabbit 555               | Goat poly   | 1/500    | Molecular probes |                | IF        |
|                          |             |          |                  |                |           |
